# Supplementary material
Source: Atypon-hosted journal article supplement (doi:10.1287/orsc.2024.19959)
Supplement: orsc.2024.19959.sm1.pdf [file orsc.2024.19959.sm1.pdf]

## Appendix A. New CEO Strategic Focus Measures.

We use the following prompt with ChatGPT 4.0 to classify each new CEO's first earnings call transcript along three strategic dimensions: innovation, market growth, and cost efficiency.

You are the top McKinsey Analyst in area CEO transcript analysis. Given a list of quotes from an earnings call transcript, evaluate the relative focus of the CEO speaker on the following criteria from 0 to 1 (1 means this criteria is the dominant focus, 0 means not at all) (Note: CEOs can have multiple focuses):

1. Innovation, purpose, long-term and non-financial objectives
2. Cost, margin, and other quantitative objects focused on efficiency, cost reduction, and profitability.
3. Market growth with a focus on quantitative metrics including but not limited to growth rates, new market entry, capital and IT investments, and customer growth; exclude cost-related metrics

return only these scores as comma separated values. do not give them a label.

*Notes:* Effective input prompts are critical to generating relevant and accurate responses from LLM-based AI chatbots, so we tested multiple input prompts on a subset of earnings call transcripts.

Each transcript receives a score on all three dimensions, which we standardize using z-scores to generate the *Innovation*, *Market Growth*, and *Cost Efficiency* scores. Appendix Table A9 presents summary statistics for these standardized scores.

We classify the new CEO as innovation-focused, market-growth-focused, and cost-efficiency-focused if their score on the corresponding dimension is above the sample median. If a CEO scores above the median on more than one dimension or does not exceed the median on any dimension, we assign them to the category in which they received the highest standardized score.

To illustrate, below are sample quotes from new CEOs with different strategic emphases:

- Innovation focus: "As I've told our employees, our industry does not respect tradition; it only respects innovation. This applies to us and everyone else."
- Cost efficiency focus: "We're working to become a geographically focused and cost-efficient company with an improving credit profile. By paying a consistent quarterly dividend and growing our established business platforms, we believe we will be positioned to deliver compelling total shareholder returns."
- Market growth focus: "We had a strong fourth quarter, led by record activity levels, new infrastructure coming online... is supporting our growth ..."

Appendix Table A10 shows the distribution of firms and sample across these three categories.

## Appendix B. Complex Problem-Solving and Collaboration Measures.

We create complex problem-solving and collaboration measures based on Hay Group's nine job evaluation components. Hay Group's nine job components are grouped into knowledge (technical/practical, managerial, and communication), problem solving (thinking environment, thinking challenge), and accountability (freedom to act, impact, scope, and non-quantifiable).

Our data includes job-level information on *Occupation*, *Skill Level*, and *Job Title*. Using this information, we ask ChatGPT 4.0 to assign scores for nine components for each job on a 1-8 scale, using the Hay Group's definition and the nature of job based on *Occupation* and *Job Title*. Next, we adjust these scores using *Skill Level* and by identifying managerial jobs (we use keywords such as "manager," "director," "vp," "chief," "executive," or "head" in *Job Title*). Following adjustments, we standardize each component into z-scores.

The Complex Problem-Solving Index is the average sum of the z-scores for three relevant components: (i) practical/technical know-how, (ii) problem-solving thinking environment, and (iii) problem-solving thinking challenge. The Collaboration Index is the average sum of the z-scores for four components: (i) communicating know-how, (ii) planning know-how, (iii) account freedom, and (iv) account area.

If the occupation is coded as "Unclassified" or "General/Other," we assign missing values for all components and indexes.

## Appendix Figures and Tables.

**Figure A1:** Pay-benchmark sensitivity across various model specifications.

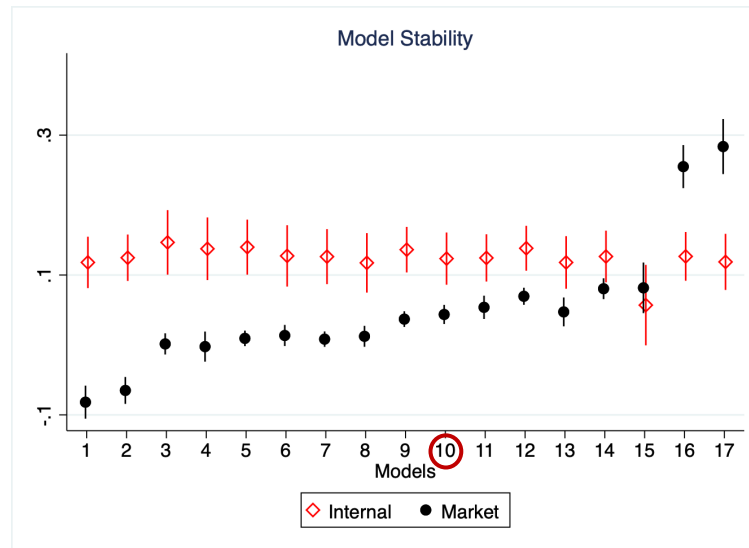

Estimated coefficients across various specifications:

1. Main specification but with year fixed effect, firm fixed effect, and skill-occupation-region three-way fixed effect
2. Main specification but with year fixed effect, firm fixed effect, and skill-occupation-region three-way fixed effect, and no weight
3. Main specification but first-differenced dependent and explanatory variables, and no weight
4. Main specification but first-differenced dependent and explanatory variables
5. Main specification but first-differenced dependent and explanatory variables, with year fixed effect, and no weight
6. Main specification but first-differenced dependent and explanatory variables, with year fixed effect
7. Main specification but first-differenced dependent and explanatory variables, with year fixed effect and firm fixed effect, and no weight
8. Main specification but first-differenced dependent and explanatory variables, with year fixed effect and firm fixed effect
9. Main specification but with no weight
- 10. Main specification**
11. Main specification but with year fixed effect, firm fixed effect, and skill-occupation two-way fixed effect, and no weight
12. Main specification but with year fixed effect and firm-skill-occupation three-way fixed effect, and no weight
13. Main specification but with year fixed effect, firm fixed effect, and skill-occupation two-way fixed effect
14. Main specification but with year fixed effect and firm-skill-occupation three-way fixed effect
15. Main specification but weighted by number of observations in "firm-year-skill-occupation-region"
16. Main specification but with year fixed effect, firm fixed effect, skill fixed effect, and occupation fixed effect, and no weight
17. Main specification but with year fixed effect, firm fixed effect, skill fixed effect, and occupation fixed effect

**Figure A2.** Event study of CEO change and shift in pay-benchmark sensitivity.

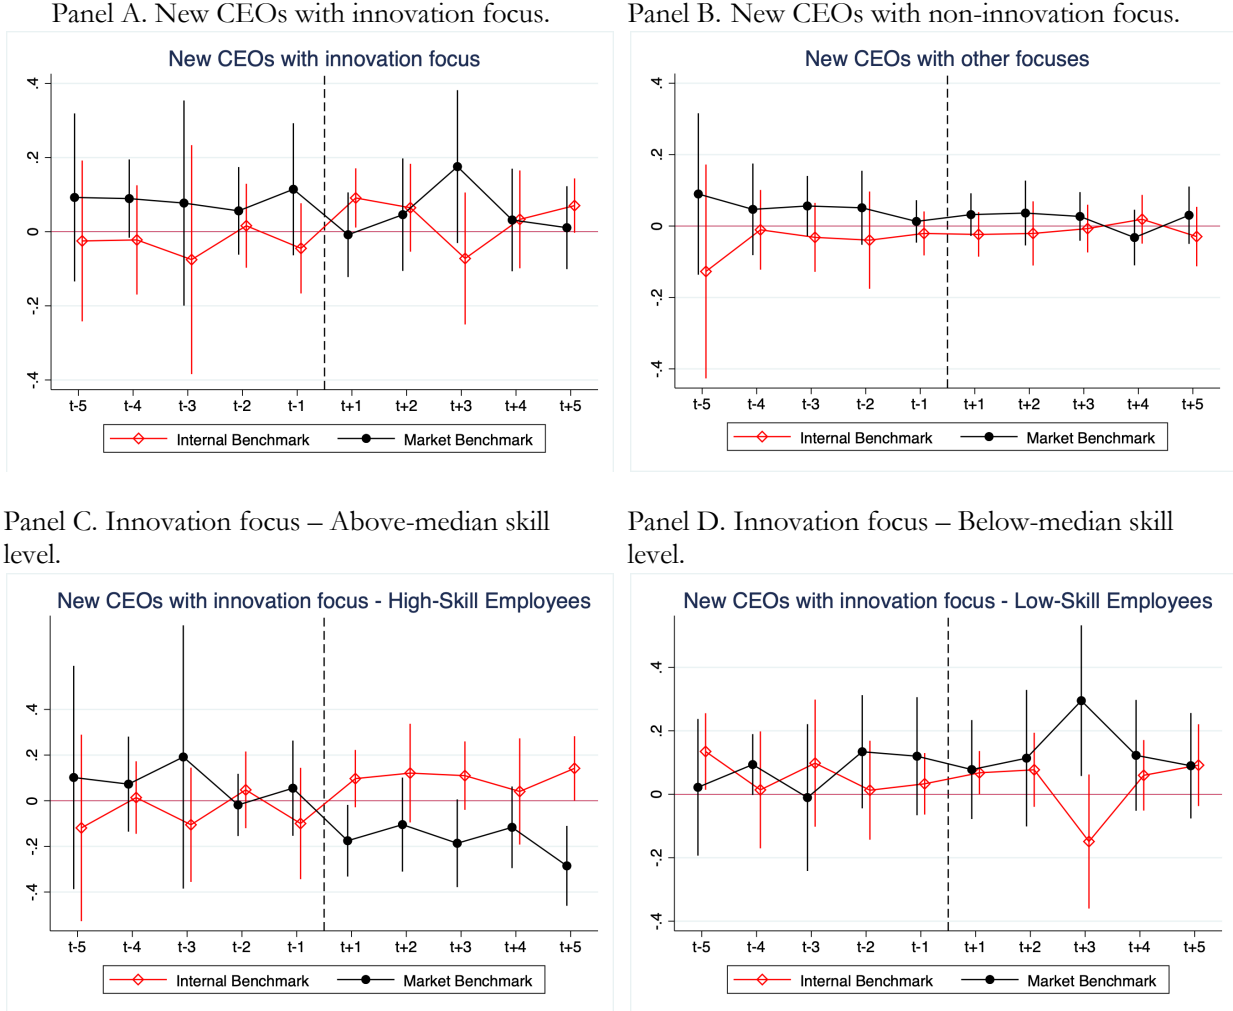

*Notes:* Each marker represents a coefficient estimate from the stacked difference-in-differences event study model, indicating the marginal change of internal and market pay sensitivities for employees at treated firms (firms with new CEOs) in each year relative to the baseline year t-1 (one year before the CEO change). In Panels A, C, and D, while the post-event internal pay sensitivity estimates are individually imprecise but consistently positive (except for t+3 in Panels A and D). In Panel C, the post-event market pay sensitivities are imprecise in some periods but consistently negative. In Panels A and D, the post-event market pay sensitivities are individually imprecise, although consistently positive. None of the panels show evidence of pre-trends. Overall, these point estimates are somewhat noisier, likely reflecting reduced precision, but they move in the same direction as the regression estimates in Table 3, indicating that internal pay sensitivity increases for high-skilled workers following an innovation-focused CEO change.

**Figure A3.** Event study of CEO change and shift in pay-benchmark sensitivity by job type.

Panel A. Innovation Focus: Complex Problem Solving (High)

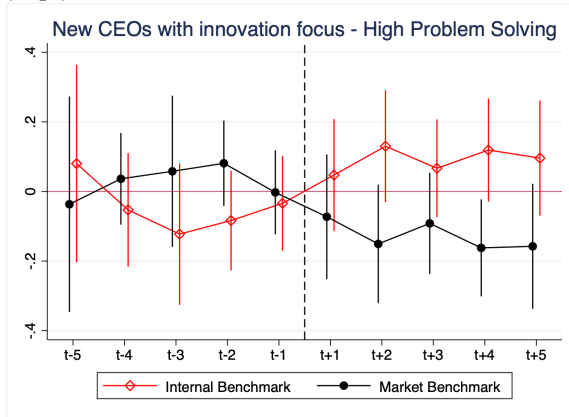

Panel B. Other Focus: Complex Problem Solving (High)

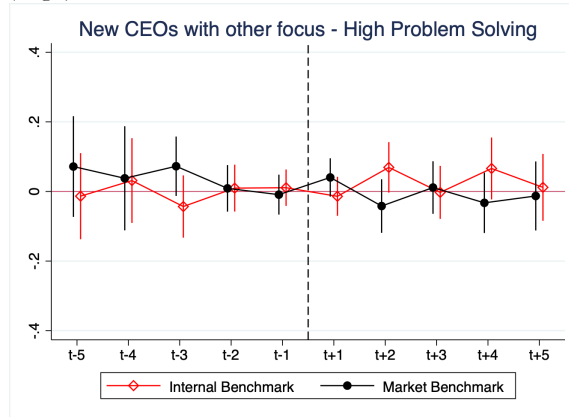

Panel C. Innovation Focus: Complex Problem Solving (High) & Collaboration (High)

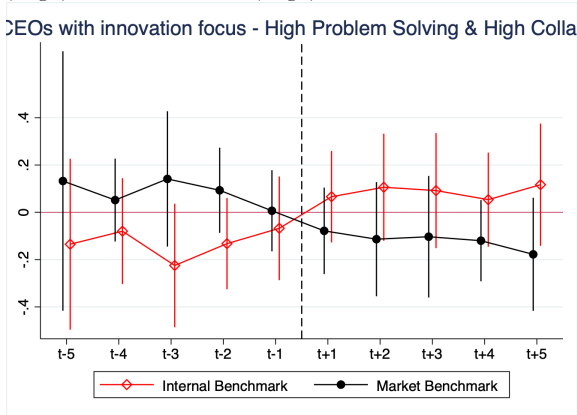

Panel D. Other Focus: Complex Problem Solving (High) & Collaboration (High)

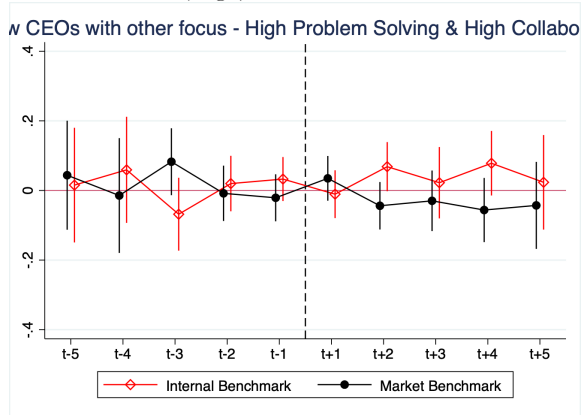

Panel E. Innovation Focus: Complex Problem Solving (Highest, Q4)

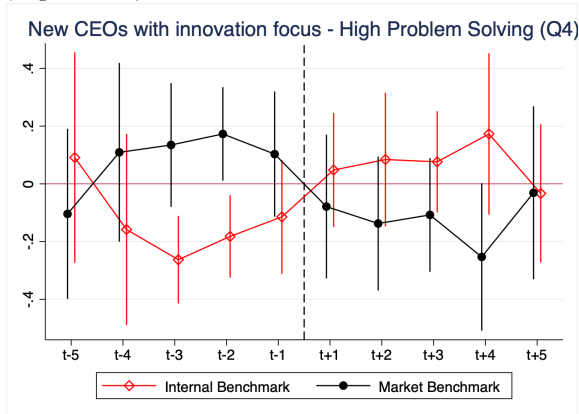

Panel F. Other Focus: Complex Problem Solving (Highest, Q4)

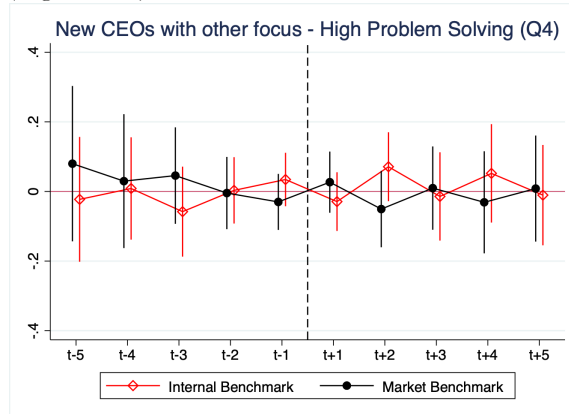

Notes: Each marker represents a coefficient estimate from the stacked difference-in-differences event study model, indicating the marginal change of internal and market pay sensitivities for employees in specific job types (e.g., complex problem-solving and high-collaborative jobs) at treated firms (firms with new CEOs) in each year relative to the baseline year t-1 (one year before the CEO change).

**Figure A4.** Pay-benchmark sensitivity by employee skill level and firm knowledge intensity, excluding high-ROA firms.

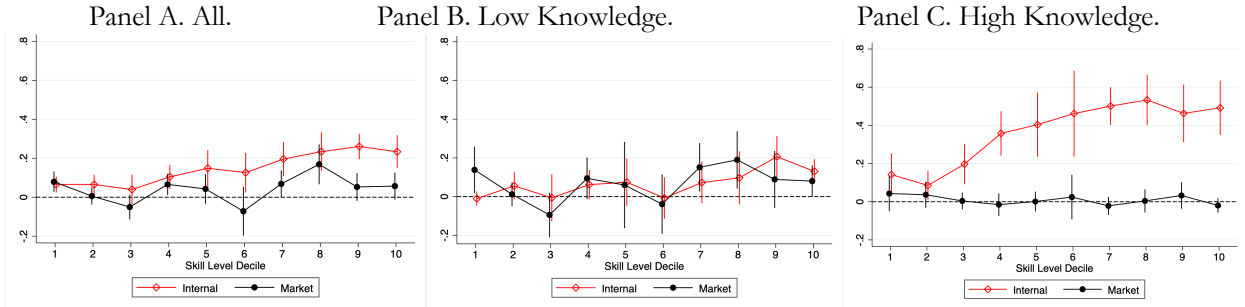

Notes: This figure reproduces Figure 2, excluding firms with the highest ROA, defined as those above the 90th percentile of ROA in each year.

**Figure A5.** Pay-benchmark sensitivity by employee skill level and firm knowledge intensity, excluding large firms.

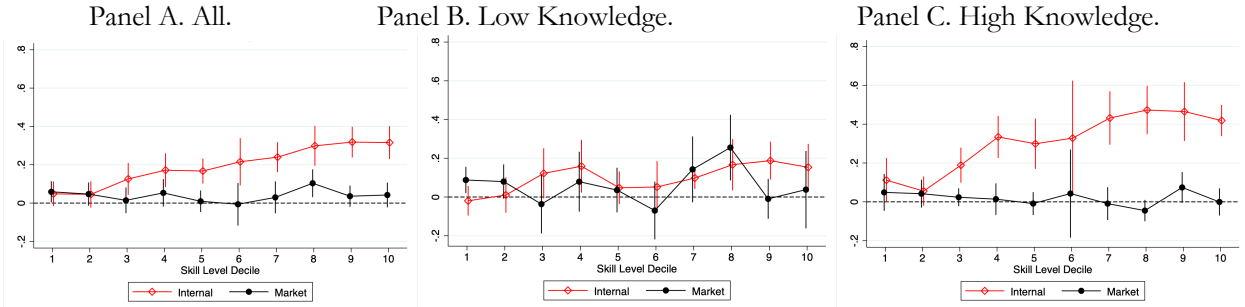

Notes: This figure reproduces Figure 2, excluding large firms, defined as those with more than 25,000 employees.

**Figure A6.** Pay-benchmark sensitivity by employee skill level and firm knowledge intensity, using region-agnostic market benchmark.

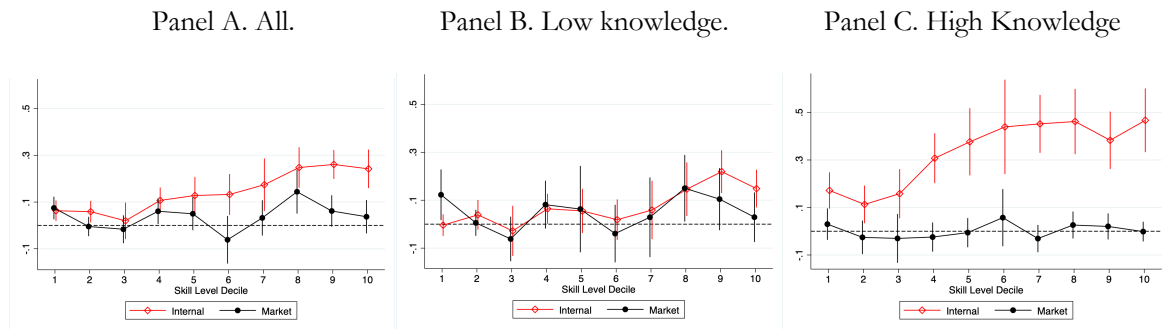

Notes: This figure reproduces Figure 2, using region-agnostic market benchmark.

**Figure A7.** Pay-benchmark sensitivity by employee skill level and firm knowledge intensity, using same-industry (instead of same-region) market benchmark.

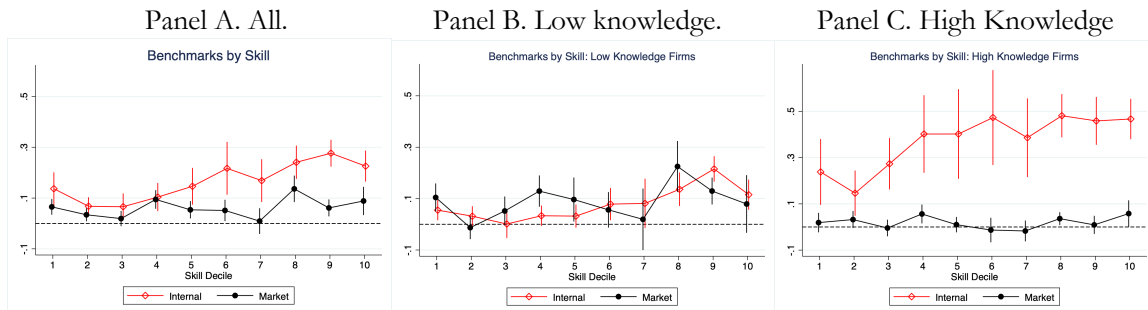

Notes: This figure reproduces Figure 2, using region-agnostic, same-industry market benchmark.

**Table A1.** Representative occupations per skill level and knowledge intensity.

| <b>Skill Decile</b> | <b>Low Knowledge</b>                                                                                                                                            | <b>High Knowledge</b>                                                                                                            |
|---------------------|-----------------------------------------------------------------------------------------------------------------------------------------------------------------|----------------------------------------------------------------------------------------------------------------------------------|
| 1 (lowest)          | Retail Operations Sales Staff, Retail Operations Store Operations, Support Service, Warehousing/Material Management, Stores Loss Prevention                     | Production, Distribution/Transportation, Warehousing/Material Management, Territory Sales, Production-Maintenance/Skilled Manual |
| 5 (median)          | Retail Operations Store Management, Warehousing/Material Management, Merchandise Operations-Buying, Territory Sales, Design                                     | General Engineers, Production, Territory Sales, Research and Development, Information Technology-Application Development         |
| 10 (top)            | Retail Operations Store Management, Retail Operations Regional Management, Merchandise Operations-Buying, Professional Lawyers, Financial Planning and Analysis | General Engineers, Production, Research and Development, Professional Lawyers, Key Account Sales, General Finance and Accounting |

**Table A2. Examples of functions and nested occupations.**

| Function                       | Occupation                                                                                                                                                                                                                                                                                                                                                                                                                                                                                                                  |
|--------------------------------|-----------------------------------------------------------------------------------------------------------------------------------------------------------------------------------------------------------------------------------------------------------------------------------------------------------------------------------------------------------------------------------------------------------------------------------------------------------------------------------------------------------------------------|
| Retail Operations              | Retail Operations Sales Staff<br>Retail Operations Store Operations<br>Supervision and Sales Staff<br>Retail Operations Pharmacy<br>Retail Operations-Regional Management<br>Retail Operations-Store Management                                                                                                                                                                                                                                                                                                             |
| Administrative/Support/Service | Clerical Services<br>Document Production<br>Secretarial<br>Support Services                                                                                                                                                                                                                                                                                                                                                                                                                                                 |
| Finance and Accounting         | Accounting<br>Audit<br>Controller<br>Financial Planning and Analysis<br>Taxation<br>Treasury                                                                                                                                                                                                                                                                                                                                                                                                                                |
| Analytics and Data Science     | Actuarial Services<br>Analytics and Data Science<br>Economic Research                                                                                                                                                                                                                                                                                                                                                                                                                                                       |
| Information Technology         | Blockchain<br>Business and Systems Analysis<br>Cyber Security<br>Enterprise Information Architecture<br>IT Management/Operations and End User Support<br>Application Development<br>Data Management<br>IT Consultancy<br>Infrastructure Development<br>Internet-Based Services and Support<br>Service Level and Process Management<br>Software Engineering<br>Technical Operations and End User Support<br>Infrastructure<br>Software Development and Implementation<br>Software/Application Development and Implementation |
| Marketing                      | Brand/Product Management<br>Digital Marketing / Digital Campaigns<br>E-Commerce<br>Market Research<br>Promotions and Advertising<br>Search Engine Optimization<br>Social Media<br>Trade Marketing<br>User Experience Design<br>Web Content<br>Public Relations and Promotions                                                                                                                                                                                                                                               |
| Merchandise Operations         | Allocation<br>Inventory Planning<br>Buying<br>Merchandising / Range and Space Planning<br>Sourcing                                                                                                                                                                                                                                                                                                                                                                                                                          |

**Table A3.** Relationship between total compensation and internal and market pay benchmarks.

|                                          | <i>Dependent variable: Total compensation</i> |                      |                     |                     |
|------------------------------------------|-----------------------------------------------|----------------------|---------------------|---------------------|
|                                          | (1)                                           | (2)                  | (3)                 | (4)                 |
| Internal Pay                             | 0.132***<br>(0.019)                           |                      | 0.132***<br>(0.019) | 0.132***<br>(0.018) |
| Market Pay                               |                                               | 0.045***<br>(0.007)  | 0.045***<br>(0.007) | 0.045***<br>(0.007) |
| ROA                                      |                                               |                      |                     | -0.012<br>(0.049)   |
| Log Sale                                 |                                               |                      |                     | 0.005<br>(0.006)    |
| Constant                                 | 9.685***<br>(0.209)                           | 10.669***<br>(0.083) | 9.186***<br>(0.210) | 9.138***<br>(0.221) |
| Firm-Occupation-Skill<br>Level-Region FE | Yes                                           | Yes                  | Yes                 | Yes                 |
| Year FE                                  | Yes                                           | Yes                  | Yes                 | Yes                 |
| Observations                             | 177,540                                       | 177,540              | 177,540             | 177,540             |
| Adjusted R-squared                       | 0.964                                         | 0.964                | 0.964               | 0.964               |

*Notes:* Significant at \*\*\*1%, \*\*5%, and \*10%.

Total compensation is a sum of cash compensation (base salary plus bonus) and long-term incentives.

**Table A4.** Relationship between total compensation and internal and market pay benchmarks by employee type.

| Job Type                              | <i>Dependent variable: Total compensation</i> |                                    |                                |                     |                      |                     |
|---------------------------------------|-----------------------------------------------|------------------------------------|--------------------------------|---------------------|----------------------|---------------------|
|                                       | Complex Problem Solving (Low) (1)             | Complex Problem Solving (High) (2) | Complex Problem Solving (High) |                     |                      |                     |
|                                       |                                               |                                    | Low Collab. (3)                | High Collab. (4)    | Medium-High (Q3) (5) | Highest (Q4) (6)    |
| Internal Pay                          | 0.104***<br>(0.019)                           | 0.200***<br>(0.023)                | 0.135***<br>(0.023)            | 0.225***<br>(0.025) | 0.187***<br>(0.022)  | 0.217***<br>(0.032) |
| Market Pay                            | 0.048***<br>(0.009)                           | 0.032***<br>(0.010)                | 0.013<br>(0.013)               | 0.042***<br>(0.014) | -0.001<br>(0.010)    | 0.062***<br>(0.015) |
| ROA                                   | -0.063<br>(0.057)                             | 0.151***<br>(0.053)                | 0.175**<br>(0.072)             | 0.140***<br>(0.052) | 0.103*<br>(0.057)    | 0.205***<br>(0.073) |
| Log Sale                              | 0.005<br>(0.007)                              | 0.005<br>(0.008)                   | 0.010<br>(0.010)               | 0.003<br>(0.008)    | 0.003<br>(0.009)     | 0.009<br>(0.011)    |
| Constant                              | 9.300***<br>(0.246)                           | 8.779***<br>(0.238)                | 9.498***<br>(0.281)            | 8.467***<br>(0.266) | 9.292***<br>(0.261)  | 8.232***<br>(0.343) |
| Firm-Occupation-Skill Level-Region FE | Yes                                           | Yes                                | Yes                            | Yes                 | Yes                  | Yes                 |
| Year FE                               | Yes                                           | Yes                                | Yes                            | Yes                 | Yes                  | Yes                 |
| Observations                          | 117,370                                       | 55,432                             | 16,489                         | 38,943              | 29,405               | 26,027              |
| Adjusted R-squared                    | 0.957                                         | 0.953                              | 0.942                          | 0.943               | 0.950                | 0.956               |

Notes: Significant at \*\*\*1%, \*\*5%, and \*10%.

Total compensation is a sum of cash compensation (base salary plus bonus) and long-term incentives.

**Table A5.** Correlation matrix.

Panel A. Between-unit correlations.

|                 | 1     | 2     | 3      | 4     | 5     |
|-----------------|-------|-------|--------|-------|-------|
| 1. Employee Pay | 1.000 |       |        |       |       |
| 2. Internal Pay | 0.896 | 1.000 |        |       |       |
| 3. Market Pay   | 0.896 | 0.879 | 1.000  |       |       |
| 4. ROA          | 0.014 | 0.016 | 0.011  | 1.000 |       |
| 5. Sales        | 0.002 | 0.000 | -0.007 | 0.013 | 1.000 |

Panel B. Within-unit correlations.

|                 | 1      | 2      | 3      | 4     | 5     |
|-----------------|--------|--------|--------|-------|-------|
| 1. Employee Pay | 1.000  |        |        |       |       |
| 2. Internal Pay | 0.359  | 1.000  |        |       |       |
| 3. Market Pay   | 0.145  | 0.150  | 1.000  |       |       |
| 4. ROA          | -0.041 | -0.047 | -0.052 | 1.000 |       |
| 5. Sales        | 0.073  | 0.151  | 0.087  | 0.045 | 1.000 |

Panel C. Correlations of other variables.

|                                            | 1     | 2     | 3     | 4     | 5     |
|--------------------------------------------|-------|-------|-------|-------|-------|
| 1. Skill Level                             | 1.000 |       |       |       |       |
| 2. Knowledge Intensity                     | 0.126 | 1.000 |       |       |       |
| 3. Firm Size                               | 0.043 | 0.044 | 1.000 |       |       |
| 4. Complex Problem Solving                 | 0.371 | 0.181 | 0.040 | 1.000 |       |
| 5. Complex Problem Solving & Collaboration | 0.443 | 0.157 | 0.007 | 0.785 | 1.000 |

*Table Notes:* Panel A presents between-unit correlations, calculated across “firm-Occupation-Skill Level-Region” means. Panel B presents within-unit correlations, calculated after demeaning each variable by its “firm-Occupation-Skill Level-Region” mean. They remove persistent unit-level differences and instead capture co-movement over time within the same unit, which reflects the identifying variation in our empirical design. Panel C presents other variables used for subsample analyses.

**Table A6.** Distribution by industry and knowledge intensity.

| A. Distribution by Industry               |                 |                 |                     |                     |                         |  |
|-------------------------------------------|-----------------|-----------------|---------------------|---------------------|-------------------------|--|
| Industry                                  | Number of Firms | Number of Units | Number of Employees | Knowledge Intensity | Knowledge Industry Type |  |
| Life Sciences                             | 16              | 2,675           | 32,491              | 0.320               | High                    |  |
| High Technology incl. Aerospace & Defense | 14              | 2,751           | 88,152              | 0.122               | High                    |  |
| Diversified Industrials                   | 6               | 5,427           | 168,438             | 0.140               | High                    |  |
| Heavy Manufacturing                       | 22              | 17,009          | 607,612             | 0.114               | High                    |  |
| Chemicals                                 | 54              | 24,932          | 310,797             | 0.043               | High                    |  |
| Light Manufacturing                       | 19              | 3,853           | 55,398              | 0.042               | High                    |  |
| Fast Moving Consumer Goods                | 73              | 16,399          | 611,926             | 0.033               | Moderate                |  |
| Construction & Materials                  | 10              | 3,316           | 32,838              | 0.017               | Moderate                |  |
| Oil & Gas                                 | 23              | 3,311           | 48,764              | 0.014               | Moderate                |  |
| Business/Professional Services            | 14              | 5,718           | 164,328             | 0.012               | Moderate                |  |
| Metals/Mining                             | 4               | 809             | 11,068              | 0.011               | Moderate                |  |
| Insurance                                 | 36              | 19,228          | 595,058             | 0.007               | Moderate                |  |
| Retailers                                 | 123             | 60,284          | 15,412,530          | 0.006               | Low                     |  |
| Financial Services                        | 18              | 1,680           | 82,829              | 0.000               | Low                     |  |
| Healthcare                                | 9               | 2,101           | 489,701             | 0.000               | Low                     |  |
| Restaurants                               | 15              | 468             | 31,506              | 0.000               | Low                     |  |
| Transportation                            | 4               | 2,530           | 154,371             | 0.000               | Low                     |  |
| Utilities                                 | 19              | 5,039           | 76,960              | 0.000               | Low                     |  |

  

| B. Distribution by Knowledge Industry Type |                 |            |                 |            |                     |                |
|--------------------------------------------|-----------------|------------|-----------------|------------|---------------------|----------------|
| Knowledge Industry Type                    | Number of Firms | % of Firms | Number of Units | % of Units | Number of Employees | % of Employees |
| High                                       | 131             | 27.35      | 56,657          | 31.91      | 1,262,888           | 6.66           |
| Moderate                                   | 160             | 33.40      | 48,781          | 27.48      | 1,463,982           | 7.72           |
| Low                                        | 188             | 39.25      | 72,102          | 40.61      | 16,247,897          | 85.63          |

**Table A7.** Relative strength of internal-versus-market benchmark by firm knowledge intensity.

| Industry Type                         | <i>Dependent variable: Employee pay</i> |                     |                     |                     |
|---------------------------------------|-----------------------------------------|---------------------|---------------------|---------------------|
|                                       | All                                     | Low Knowledge       | Moderate Knowledge  | High Knowledge      |
|                                       | (1)                                     | (2)                 | (3)                 | (4)                 |
| Internal Pay                          | 0.123***<br>(0.019)                     | 0.054***<br>(0.018) | 0.162***<br>(0.037) | 0.360***<br>(0.043) |
| Market Pay                            | 0.044***<br>(0.007)                     | 0.050***<br>(0.012) | 0.038***<br>(0.012) | 0.014*<br>(0.007)   |
| ROA                                   | -0.019<br>(0.047)                       | -0.104*<br>(0.054)  | 0.132<br>(0.107)    | 0.103<br>(0.064)    |
| Log Sale                              | 0.005<br>(0.006)                        | 0.006<br>(0.009)    | 0.006<br>(0.012)    | 0.006<br>(0.008)    |
| Constant                              | 9.241***<br>(0.226)                     | 9.807***<br>(0.264) | 8.859***<br>(0.421) | 7.087***<br>(0.485) |
| Firm-Occupation-Skill Level-Region FE | Yes                                     | Yes                 | Yes                 | Yes                 |
| Year FE                               | Yes                                     | Yes                 | Yes                 | Yes                 |
| Observations                          | 177,540                                 | 72,102              | 48,781              | 56,657              |
| Adjusted R-squared                    | 0.965                                   | 0.960               | 0.963               | 0.965               |

*Notes:* Significant at \*\*\*1%, \*\*5%, and \*10%.

**Table A8.** Relative strength of internal-versus-market benchmark by employee skill level.

| Employee skill decile                    | <i>Dependent variable: Employee pay</i> |                     |                      |                     |                     |                     |                     |                     |                     |                     |
|------------------------------------------|-----------------------------------------|---------------------|----------------------|---------------------|---------------------|---------------------|---------------------|---------------------|---------------------|---------------------|
|                                          | Decile 1<br>(1)                         | Decile 2<br>(2)     | Decile 3<br>(3)      | Decile 4<br>(4)     | Decile 5<br>(5)     | Decile 6<br>(6)     | Decile 7<br>(7)     | Decile 8<br>(8)     | Decile 9<br>(9)     | Decile 10<br>(10)   |
| Internal Pay                             | 0.054***<br>(0.021)                     | 0.061***<br>(0.021) | 0.027<br>(0.040)     | 0.085***<br>(0.025) | 0.126***<br>(0.038) | 0.135***<br>(0.041) | 0.169***<br>(0.055) | 0.246***<br>(0.039) | 0.260***<br>(0.031) | 0.242***<br>(0.038) |
| Market Pay                               | 0.038**<br>(0.015)                      | 0.004<br>(0.015)    | -0.003<br>(0.022)    | 0.039**<br>(0.017)  | 0.025<br>(0.022)    | -0.005<br>(0.023)   | 0.016<br>(0.016)    | 0.088***<br>(0.030) | 0.048***<br>(0.017) | 0.021<br>(0.030)    |
| ROA                                      | -0.007<br>(0.048)                       | .092*<br>(0.053)    | -0.046<br>(0.169)    | 0.120<br>(0.088)    | -0.082<br>(0.141)   | 0.071<br>(0.142)    | 0.140**<br>(0.070)  | 0.092<br>(0.084)    | 0.135**<br>(0.064)  | 0.117<br>(0.081)    |
| Log Sale                                 | 0.004<br>(0.005)                        | 0.010**<br>(0.004)  | 0.004<br>(0.008)     | 0.004<br>(0.007)    | 0.017*<br>(0.009)   | -0.002<br>(0.016)   | -0.018*<br>(0.010)  | 0.002<br>(0.008)    | -0.011<br>(0.009)   | -0.001<br>(0.014)   |
| Constant                                 | 9.492***<br>(0.294)                     | 9.951***<br>(0.300) | 10.645***<br>(0.555) | 9.657***<br>(0.333) | 9.377***<br>(0.373) | 9.912***<br>(0.610) | 9.547***<br>(0.695) | 7.719***<br>(0.467) | 8.245***<br>(0.397) | 8.843***<br>(0.428) |
| Firm-Occupation-Skill<br>Level-Region FE | Yes                                     | Yes                 | Yes                  | Yes                 | Yes                 | Yes                 | Yes                 | Yes                 | Yes                 | Yes                 |
| Year FE                                  | Yes                                     | Yes                 | Yes                  | Yes                 | Yes                 | Yes                 | Yes                 | Yes                 | Yes                 | Yes                 |
| Observations                             | 21,063                                  | 14,234              | 18,124               | 14,979              | 18,633              | 10,231              | 19,489              | 17,350              | 15,367              | 10,205              |
| Adjusted R-squared                       | 0.943                                   | 0.937               | 0.864                | 0.889               | 0.878               | 0.855               | 0.832               | 0.836               | 0.846               | 0.849               |

Notes: Significant at \*\*\*1%, \*\*5%, and \*10%.

**Table A9.** Relative strength of internal-versus-market benchmark by employee skill level in low knowledge industries.

| Employee skill decile                    | <i>Dependent variable: Employee pay</i> |                     |                      |                     |                     |                      |                      |                     |                     |                     |
|------------------------------------------|-----------------------------------------|---------------------|----------------------|---------------------|---------------------|----------------------|----------------------|---------------------|---------------------|---------------------|
|                                          | Decile 1<br>(1)                         | Decile 2<br>(2)     | Decile 3<br>(3)      | Decile 4<br>(4)     | Decile 5<br>(5)     | Decile 6<br>(6)      | Decile 7<br>(7)      | Decile 8<br>(8)     | Decile 9<br>(9)     | Decile 10<br>(10)   |
| Internal Pay                             | -0.009<br>(0.022)                       | 0.041<br>(0.027)    | -0.015<br>(0.053)    | 0.038<br>(0.028)    | 0.064<br>(0.047)    | 0.038<br>(0.042)     | 0.048<br>(0.058)     | 0.145***<br>(0.045) | 0.190***<br>(0.039) | 0.151***<br>(0.039) |
| Market Pay                               | 0.058*<br>(0.034)                       | 0.022<br>(0.021)    | -0.017<br>(0.026)    | 0.059**<br>(0.030)  | 0.036<br>(0.046)    | -0.005<br>(0.038)    | 0.020<br>(0.029)     | 0.111**<br>(0.049)  | 0.071***<br>(0.026) | 0.016<br>(0.046)    |
| ROA                                      | -0.050<br>(0.061)                       | 0.059<br>(0.070)    | -0.173<br>(0.202)    | 0.063<br>(0.123)    | -0.190<br>(0.206)   | 0.075<br>(0.181)     | 0.058<br>(0.092)     | 0.020<br>(0.113)    | 0.088<br>(0.078)    | 0.001<br>(0.129)    |
| Log Sale                                 | 0.010**<br>(0.005)                      | 0.002<br>(0.007)    | -0.005<br>(0.014)    | 0.013<br>(0.013)    | 0.018<br>(0.016)    | 0.002<br>(0.025)     | -0.035*<br>(0.020)   | -0.006<br>(0.015)   | -0.011<br>(0.015)   | 0.036<br>(0.024)    |
| Constant                                 | 9.804***<br>(0.493)                     | 9.943***<br>(0.406) | 11.257***<br>(0.744) | 9.778***<br>(0.476) | 9.883***<br>(0.510) | 10.916***<br>(0.724) | 10.987***<br>(0.912) | 8.667***<br>(0.678) | 8.721***<br>(0.608) | 9.635***<br>(0.533) |
| Firm-Occupation-Skill<br>Level-Region FE | Yes                                     | Yes                 | Yes                  | Yes                 | Yes                 | Yes                  | Yes                  | Yes                 | Yes                 | Yes                 |
| Year FE                                  | Yes                                     | Yes                 | Yes                  | Yes                 | Yes                 | Yes                  | Yes                  | Yes                 | Yes                 | Yes                 |
| Observations                             | 10,480                                  | 6,536               | 7,941                | 6,044               | 7,041               | 4,349                | 6,393                | 6,363               | 5,566               | 4,104               |
| Adjusted R-squared                       | 0.930                                   | 0.925               | 0.814                | 0.865               | 0.839               | 0.841                | 0.794                | 0.777               | 0.816               | 0.796               |

Notes: Significant at \*\*\*1%, \*\*5%, and \*10%.

**Table A10.** Relative strength of internal-versus-market benchmark by employee skill level in high knowledge industries.

| Employee skill decile                 | <i>Dependent variable: Employee pay</i> |                     |                     |                     |                     |                     |                     |                     |                     |                     |
|---------------------------------------|-----------------------------------------|---------------------|---------------------|---------------------|---------------------|---------------------|---------------------|---------------------|---------------------|---------------------|
|                                       | Decile 1                                | Decile 2            | Decile 3            | Decile 4            | Decile 5            | Decile 6            | Decile 7            | Decile 8            | Decile 9            | Decile 10           |
|                                       | (1)                                     | (2)                 | (3)                 | (4)                 | (5)                 | (6)                 | (7)                 | (8)                 | (9)                 | (10)                |
| Internal Pay                          | 0.104**<br>(0.044)                      | 0.102***<br>(0.033) | 0.194***<br>(0.047) | 0.362***<br>(0.057) | 0.436***<br>(0.074) | 0.541***<br>(0.089) | 0.557***<br>(0.053) | 0.561***<br>(0.057) | 0.477***<br>(0.076) | 0.496***<br>(0.065) |
| Market Pay                            | 0.030<br>(0.025)                        | 0.005<br>(0.019)    | 0.040**<br>(0.018)  | 0.025<br>(0.022)    | 0.001<br>(0.015)    | 0.026<br>(0.020)    | 0.002<br>(0.017)    | 0.003<br>(0.016)    | 0.004<br>(0.015)    | -0.021<br>(0.014)   |
| ROA                                   | 0.122<br>(0.077)                        | 0.130*<br>(0.072)   | 0.230*<br>(0.136)   | 0.151***<br>(0.054) | 0.025<br>(0.095)    | -0.161<br>(0.223)   | 0.104<br>(0.082)    | 0.145**<br>(0.069)  | 0.130<br>(0.098)    | 0.212***<br>(0.059) |
| Log Sale                              | 0.010<br>(0.009)                        | 0.019*<br>(0.011)   | -0.015<br>(0.010)   | 0.005<br>(0.007)    | -0.001<br>(0.008)   | 0.018<br>(0.018)    | -0.009<br>(0.009)   | -0.006<br>(0.007)   | 0.002<br>(0.012)    | -0.017<br>(0.014)   |
| Constant                              | 9.232***<br>(0.415)                     | 9.621***<br>(0.441) | 8.625***<br>(0.585) | 6.803***<br>(0.635) | 6.398***<br>(0.829) | 4.817***<br>(1.132) | 5.180***<br>(0.646) | 5.172***<br>(0.714) | 6.127***<br>(0.877) | 6.482***<br>(0.761) |
| Firm-Occupation-Skill Level-Region FE | Yes                                     | Yes                 | Yes                 | Yes                 | Yes                 | Yes                 | Yes                 | Yes                 | Yes                 | Yes                 |
| Year FE                               | Yes                                     | Yes                 | Yes                 | Yes                 | Yes                 | Yes                 | Yes                 | Yes                 | Yes                 | Yes                 |
| Observations                          | 4,793                                   | 3,666               | 5,145               | 4,564               | 6,322               | 3,352               | 7,535               | 6,132               | 5,790               | 4,111               |
| Adjusted R-squared                    | 0.897                                   | 0.899               | 0.868               | 0.868               | 0.855               | 0.801               | 0.829               | 0.854               | 0.837               | 0.851               |

Notes: Significant at \*\*\*1%, \*\*5%, and \*10%.

**Table A11.** Summary statistics of new CEO strategic focus scores.

| <b>Score</b>    | <b>Mean</b> | <b>SD</b> | <b>25<sup>th</sup></b> | <b>50<sup>th</sup></b> | <b>75<sup>th</sup></b> |
|-----------------|-------------|-----------|------------------------|------------------------|------------------------|
| Innovation      | 0.00        | 1.00      | -0.31                  | 0.32                   | 0.32                   |
| Market Growth   | 0.00        | 1.00      | -1.15                  | 0.54                   | 1.01                   |
| Cost Efficiency | 0.00        | 1.00      | -0.88                  | -0.43                  | 0.94                   |

**Table A12.** Summary statistics of firms with new CEOs.

| <b>Firm type</b>                 | <b>Number of firms</b> | <b>Number of “firm-year-skill-occupation-region” units</b> | <b>Number of employees</b> |
|----------------------------------|------------------------|------------------------------------------------------------|----------------------------|
| All firms                        | 479                    | 177,540                                                    | 18,974,767                 |
| Public firm                      | 257                    | 122,590                                                    | 16,865,144                 |
| Public firm with new CEO         | 113                    | 54,925                                                     | 10,421,227                 |
| New CEO’s focus: Innovation      | 20                     | 11,243                                                     | 2,329,520                  |
| New CEO’s focus: Market growth   | 47                     | 22,606                                                     | 4,295,812                  |
| New CEO’s focus: Cost efficiency | 46                     | 21,076                                                     | 3,795,895                  |

**Table A13.** Relationship between employee pay, benchmarks, and occupation co-location.

| Sample type                               | <i>Dependent variable: Employee pay</i> |                                           |                                           |                      |                      |
|-------------------------------------------|-----------------------------------------|-------------------------------------------|-------------------------------------------|----------------------|----------------------|
|                                           | All                                     | Occupation<br>Co-Location<br>Below Median | Occupation<br>Co-Location<br>Above Median | All                  | All                  |
|                                           | (1)                                     | (2)                                       | (3)                                       | (4)                  | (5)                  |
| Internal Pay                              | 0.123***<br>(0.019)                     | 0.083***<br>(0.020)                       | 0.173***<br>(0.025)                       | 0.089***<br>(0.018)  | 0.075***<br>(0.020)  |
| Market Pay                                | 0.044***<br>(0.007)                     | 0.042***<br>(0.012)                       | 0.031***<br>(0.007)                       | 0.043***<br>(0.007)  | 0.064***<br>(0.015)  |
| Internal Pay<br>× Occupation Co-Location  |                                         |                                           |                                           | 0.053***<br>(0.013)  | 0.077***<br>(0.024)  |
| Market Pay<br>× Occupation Co-Location    |                                         |                                           |                                           |                      | -0.031<br>(0.020)    |
| Occupation Co-Location                    |                                         |                                           |                                           | -0.595***<br>(0.145) | -0.515***<br>(0.131) |
| ROA                                       | -0.019<br>(0.047)                       | -0.087<br>(0.068)                         | 0.046<br>(0.051)                          | -0.021<br>(0.047)    | -0.021<br>(0.047)    |
| Log Sale                                  | 0.005<br>(0.006)                        | 0.009<br>(0.007)                          | 0.005<br>(0.007)                          | 0.006<br>(0.006)     | 0.006<br>(0.006)     |
| Constant                                  | 9.241***<br>(0.226)                     | 9.512***<br>(0.277)                       | 8.97***<br>(0.272)                        | 9.625***<br>(0.219)  | 9.547***<br>(0.224)  |
| Firm-Skill Level-Occupation-<br>Region FE | Yes                                     | Yes                                       | Yes                                       | Yes                  | Yes                  |
| Year FE                                   | Yes                                     | Yes                                       | Yes                                       | Yes                  | Yes                  |
| Observations                              | 177,540                                 | 726,20                                    | 90,513                                    | 177,540              | 177,540              |
| Adjusted R-squared                        | 0.965                                   | 0.966                                     | 0.959                                     | 0.965                | 0.965                |

Notes: Significant at \*\*\*1%, \*\*5%, and \*10%.

**Table A14.** Relationship between employee pay, benchmarks, complex problem-solving/collaboration, and occupation concentration.

| Job Type                                 | <i>Dependent variable: Employee pay</i> |                                       |                                |                      |                         |                      |
|------------------------------------------|-----------------------------------------|---------------------------------------|--------------------------------|----------------------|-------------------------|----------------------|
|                                          | Complex Problem Solving (Low)<br>(1)    | Complex Problem Solving (High)<br>(2) | Complex Problem Solving (High) |                      |                         |                      |
|                                          |                                         |                                       | Low Collab.<br>(3)             | High Collab.<br>(4)  | Medium-High (Q3)<br>(5) | Highest (Q4)<br>(6)  |
| Internal Pay                             | 0.070***<br>(0.021)                     | 0.069**<br>(0.028)                    | 0.052<br>(0.049)               | 0.072**<br>(0.033)   | 0.080*<br>(0.047)       | 0.060*<br>(0.033)    |
| Market Pay                               | 0.041***<br>(0.016)                     | 0.166***<br>(0.031)                   | 0.105**<br>(0.049)             | 0.207***<br>(0.036)  | 0.107**<br>(0.045)      | 0.222***<br>(0.042)  |
| Internal Pay<br>× Occupation Co-Location | 0.043*<br>(0.023)                       | 0.160***<br>(0.038)                   | 0.088<br>(0.058)               | 0.198***<br>(0.047)  | 0.115**<br>(0.055)      | 0.215***<br>(0.044)  |
| Market Pay<br>× Occupation Co-Location   | 0.007<br>(0.020)                        | -0.165***<br>(0.037)                  | -0.109*<br>(0.059)             | -0.203***<br>(0.042) | -0.133**<br>(0.052)     | -0.197***<br>(0.049) |
| Occupation Co-Location                   | -0.549***<br>(0.163)                    | 0.052<br>(0.275)                      | 0.232<br>(0.684)               | 0.062<br>(0.402)     | 0.188<br>(0.353)        | -0.201<br>(0.334)    |
| ROA                                      | -0.072<br>(0.055)                       | 0.138***<br>(0.051)                   | 0.148**<br>(0.068)             | 0.132***<br>(0.049)  | 0.092*<br>(0.053)       | 0.190***<br>(0.070)  |
| Log Sale                                 | 0.006<br>(0.007)                        | 0.007<br>(0.007)                      | 0.011<br>(0.009)               | 0.004<br>(0.007)     | 0.005<br>(0.008)        | 0.010<br>(0.010)     |
| Constant                                 | 9.756***<br>(0.246)                     | 8.722***<br>(0.313)                   | 9.382***<br>(0.593)            | 8.316***<br>(0.390)  | 9.265***<br>(0.367)     | 8.179***<br>(0.426)  |
| Firm-Occupation-Skill Level-Region FE    | Yes                                     | Yes                                   | Yes                            | Yes                  | Yes                     | Yes                  |
| Year FE                                  | Yes                                     | Yes                                   | Yes                            | Yes                  | Yes                     | Yes                  |
| Observations                             | 117,370                                 | 55,432                                | 16,489                         | 38,943               | 29,405                  | 26,027               |
| Adjusted R-squared                       | 0.958                                   | 0.954                                 | 0.944                          | 0.944                | 0.951                   | 0.957                |

*Notes:* Significant at \*\*\*1%, \*\*5%, and \*10%.

**Table A15.** Summary statistics of pay sensitivities and innovation measures.

| Variable                       | Count | Mean      | St. Dev.  | 25 <sup>th</sup> | 50 <sup>th</sup> | 75 <sup>th</sup> |
|--------------------------------|-------|-----------|-----------|------------------|------------------|------------------|
| <i>Company characteristics</i> |       |           |           |                  |                  |                  |
| Knowledge capital intensity    | 338   | 0.10      | 0.12      | 0.02             | 0.07             | 0.14             |
| Revenues (in million \$)       | 338   | 18,867.49 | 30,867.99 | 3,023.19         | 7,943.21         | 19,884.00        |
| Leverage                       | 338   | 0.29      | 0.14      | 0.20             | 0.27             | 0.39             |
| <i>Summary statistics</i>      |       |           |           |                  |                  |                  |
| Number of patents              | 338   | 126.14    | 288.69    | 2.00             | 17.50            | 81.00            |
| Stock of patents               | 338   | 653.85    | 1328.41   | 19.29            | 113.37           | 485.00           |
| Highest forward citations      | 338   | 13.88     | 33.24     | 0.00             | 2.00             | 11.00            |
| Most breakthrough innovation   | 229   | 0.48      | 0.45      | 0.04             | 0.33             | 1.00             |
| Number of publications         | 338   | 42.95     | 164.22    | 0.00             | 5.00             | 16.00            |
| Stock of publications          | 338   | 306.75    | 1,056.45  | 5.51             | 47.32            | 129.52           |
| Internal pay sensitivity       | 338   | 0.32      | 0.25      | 0.19             | 0.35             | 0.50             |
| Market pay sensitivity         | 338   | -0.39     | 0.26      | -0.58            | -0.42            | -0.23            |

Notes: Unit of analysis is “firm-year.”

**Table A16.** Internal pay sensitivity and individual innovation measures.

|                                               | <i>Dependent variable</i>                     |                                              |                                                       |                                                          |                                                    |                                                   |
|-----------------------------------------------|-----------------------------------------------|----------------------------------------------|-------------------------------------------------------|----------------------------------------------------------|----------------------------------------------------|---------------------------------------------------|
|                                               | <i>Number of Patents (logged)<sub>t</sub></i> | <i>Stock of Patents (logged)<sub>t</sub></i> | <i>Highest Forward Citations (logged)<sub>t</sub></i> | <i>Most Breakthrough Innovation (logged)<sub>t</sub></i> | <i>Number of Publications (logged)<sub>t</sub></i> | <i>Stock of Publications (logged)<sub>t</sub></i> |
|                                               | (1)                                           | (2)                                          | (3)                                                   | (4)                                                      | (5)                                                | (6)                                               |
| <i>Panel A: All workers</i>                   |                                               |                                              |                                                       |                                                          |                                                    |                                                   |
| Internal Pay Sensitivity $_{t-1}$             | 0.559***<br>(0.177)                           | 0.600***<br>(0.223)                          | 0.404***<br>(0.138)                                   | 0.024***<br>(0.009)                                      | 0.241<br>(0.154)                                   | 0.428**<br>(0.192)                                |
| Knowledge Intensity $_{t-1}$                  | 6.260***<br>(1.576)                           | 6.349***<br>(1.723)                          | 2.591**<br>(0.994)                                    | 0.209***<br>(0.050)                                      | 6.189***<br>(0.933)                                | 6.768***<br>(1.132)                               |
| Revenues (logged) $_{t-1}$                    | 0.850***<br>(0.098)                           | 0.857***<br>(0.114)                          | 0.425***<br>(0.068)                                   | 0.032***<br>(0.004)                                      | 0.744***<br>(0.102)                                | 0.927***<br>(0.120)                               |
| Leverage $_{t-1}$                             | -1.919**<br>(0.932)                           | -1.953*<br>(1.044)                           | -0.435<br>(0.724)                                     | -0.072*<br>(0.041)                                       | -0.672<br>(0.816)                                  | -0.695<br>(0.975)                                 |
| Observations                                  | 338                                           | 338                                          | 338                                                   | 229                                                      | 338                                                | 338                                               |
| Adjusted R-squared                            | 0.581                                         | 0.559                                        | 0.340                                                 | 0.466                                                    | 0.637                                              | 0.642                                             |
| <i>Panel B: Complex Problem Solving (Low)</i> |                                               |                                              |                                                       |                                                          |                                                    |                                                   |
| Internal Pay Sensitivity $_{t-1}$             | 0.489**<br>(0.207)                            | 0.519**<br>(0.250)                           | 0.342**<br>(0.155)                                    | 0.017*<br>(0.010)                                        | 0.153<br>(0.185)                                   | 0.297<br>(0.236)                                  |
| Knowledge Intensity $_{t-1}$                  | 6.467***<br>(1.536)                           | 6.560***<br>(1.668)                          | 2.718***<br>(0.963)                                   | 0.219***<br>(0.045)                                      | 6.250***<br>(0.909)                                | 6.882***<br>(1.081)                               |
| Revenues (logged) $_{t-1}$                    | 0.842***<br>(0.101)                           | 0.850***<br>(0.116)                          | 0.422***<br>(0.069)                                   | 0.032***<br>(0.004)                                      | 0.741***<br>(0.102)                                | 0.923***<br>(0.120)                               |
| Leverage $_{t-1}$                             | -1.850**                                      | -1.880*                                      | -0.387                                                | -0.063                                                   | -0.612                                             | -0.605                                            |

|                                                                           |                     |                     |                     |                     |                     |                     |
|---------------------------------------------------------------------------|---------------------|---------------------|---------------------|---------------------|---------------------|---------------------|
|                                                                           | (0.920)             | (1.035)             | (0.718)             | (0.042)             | (0.803)             | (0.968)             |
| Observations                                                              | 337                 | 337                 | 337                 | 229                 | 337                 | 337                 |
| Adjusted R-squared                                                        | 0.571               | 0.549               | 0.329               | 0.450               | 0.633               | 0.634               |
| <i>Panel C: Complex Problem Solving (High)</i>                            |                     |                     |                     |                     |                     |                     |
| Internal Pay Sensitivity $t_{-1}$                                         | 0.511***<br>(0.164) | 0.520**<br>(0.201)  | 0.365***<br>(0.116) | 0.019*<br>(0.011)   | 0.065<br>(0.135)    | 0.160<br>(0.171)    |
| Knowledge Intensity $t_{-1}$                                              | 5.895***<br>(1.671) | 5.872***<br>(1.797) | 2.043**<br>(0.907)  | 0.213***<br>(0.053) | 6.306***<br>(1.011) | 6.823***<br>(1.247) |
| Revenues (logged) $t_{-1}$                                                | 0.800***<br>(0.110) | 0.805***<br>(0.129) | 0.369***<br>(0.077) | 0.029***<br>(0.005) | 0.735***<br>(0.106) | 0.907***<br>(0.128) |
| Leverage $t_{-1}$                                                         | -1.855*<br>(0.967)  | -1.851*<br>(1.084)  | -0.141<br>(0.747)   | -0.071<br>(0.044)   | -0.656<br>(0.852)   | -0.733<br>(1.038)   |
| Observations                                                              | 316                 | 316                 | 316                 | 219                 | 316                 | 316                 |
| Adjusted R-squared                                                        | 0.588               | 0.569               | 0.347               | 0.457               | 0.636               | 0.636               |
| <i>Panel D: Complex Problem Solving (High) &amp; Collaboration (Low)</i>  |                     |                     |                     |                     |                     |                     |
| Internal Pay Sensitivity $t_{-1}$                                         | 1.084<br>(0.852)    | 1.502<br>(0.902)    | 0.970<br>(0.592)    | 0.104**<br>(0.047)  | 1.416**<br>(0.674)  | 1.905**<br>(0.835)  |
| Knowledge Intensity $t_{-1}$                                              | 8.086***<br>(2.125) | 8.106***<br>(2.125) | 2.778**<br>(1.261)  | 0.234***<br>(0.065) | 6.607***<br>(1.235) | 7.317***<br>(1.487) |
| Revenues (logged) $t_{-1}$                                                | 0.808***<br>(0.125) | 0.844***<br>(0.140) | 0.380***<br>(0.088) | 0.032***<br>(0.004) | 0.777***<br>(0.115) | 0.988***<br>(0.140) |
| Leverage $t_{-1}$                                                         | -2.081**<br>(1.004) | -2.312**<br>(1.153) | -0.039<br>(0.872)   | -0.064<br>(0.049)   | -1.165<br>(0.953)   | -1.357<br>(1.136)   |
| Observations                                                              | 278                 | 278                 | 278                 | 194                 | 278                 | 278                 |
| Adjusted R-squared                                                        | 0.566               | 0.547               | 0.309               | 0.453               | 0.637               | 0.636               |
| <i>Panel E: Complex Problem Solving (High) &amp; Collaboration (High)</i> |                     |                     |                     |                     |                     |                     |
| Internal Pay Sensitivity $t_{-1}$                                         | 1.096***<br>(0.356) | 1.050**<br>(0.428)  | 0.810***<br>(0.267) | 0.050**<br>(0.021)  | 0.047<br>(0.295)    | 0.276<br>(0.390)    |
| Knowledge Intensity $t_{-1}$                                              | 5.889***<br>(1.650) | 5.874***<br>(1.778) | 1.993**<br>(0.893)  | 0.219***<br>(0.053) | 6.308***<br>(1.002) | 6.822***<br>(1.242) |
| Revenues (logged) $t_{-1}$                                                | 0.780***<br>(0.106) | 0.787***<br>(0.124) | 0.352***<br>(0.072) | 0.028***<br>(0.004) | 0.737***<br>(0.106) | 0.903***<br>(0.127) |
| Leverage $t_{-1}$                                                         | -1.620*<br>(0.918)  | -1.571<br>(1.056)   | -0.021<br>(0.744)   | -0.075*<br>(0.041)  | -0.644<br>(0.863)   | -0.690<br>(1.058)   |
| Observations                                                              | 309                 | 309                 | 309                 | 214                 | 309                 | 309                 |
| Adjusted R-squared                                                        | 0.598               | 0.575               | 0.347               | 0.473               | 0.633               | 0.633               |
| <i>Panel F: Complex Problem Solving (High) (Medium-High, Q3)</i>          |                     |                     |                     |                     |                     |                     |
| Internal Pay Sensitivity $t_{-1}$                                         | 0.676***<br>(0.208) | 0.638**<br>(0.252)  | 0.464***<br>(0.155) | 0.021*<br>(0.011)   | 0.029<br>(0.169)    | 0.062<br>(0.209)    |
| Knowledge Intensity $t_{-1}$                                              | 5.806***<br>(1.681) | 5.788***<br>(1.801) | 1.946**<br>(0.921)  | 0.215***<br>(0.052) | 6.310***<br>(0.999) | 6.831***<br>(1.235) |
| Revenues (logged) $t_{-1}$                                                | 0.794***<br>(0.109) | 0.801***<br>(0.127) | 0.367***<br>(0.075) | 0.030***<br>(0.004) | 0.737***<br>(0.106) | 0.912***<br>(0.127) |
| Leverage $t_{-1}$                                                         | -1.736*<br>(0.930)  | -1.711<br>(1.050)   | 0.019<br>(0.727)    | -0.063<br>(0.042)   | -0.638<br>(0.834)   | -0.661<br>(1.029)   |
| Observations                                                              | 309                 | 309                 | 309                 | 214                 | 309                 | 309                 |
| Adjusted R-squared                                                        | 0.557               | 0.536               | 0.320               | 0.432               | 0.614               | 0.615               |

*Panel G: Complex Problem Solving (High) (Highest, Q4)*

|                                |                     |                     |                     |                     |                     |                     |
|--------------------------------|---------------------|---------------------|---------------------|---------------------|---------------------|---------------------|
| Internal Pay Sensitivity $t-1$ | 0.854<br>(0.658)    | 1.199<br>(0.733)    | 0.676<br>(0.477)    | 0.046<br>(0.036)    | 0.354<br>(0.479)    | 0.762<br>(0.619)    |
| Knowledge Intensity $t-1$      | 7.925***<br>(1.945) | 8.062***<br>(1.927) | 2.826**<br>(1.200)  | 0.231***<br>(0.065) | 6.747***<br>(1.189) | 7.519***<br>(1.438) |
| Revenues (logged) $t-1$        | 0.817***<br>(0.110) | 0.841***<br>(0.126) | 0.385***<br>(0.077) | 0.032***<br>(0.004) | 0.754***<br>(0.105) | 0.945***<br>(0.128) |
| Leverage $t-1$                 | -2.324**<br>(0.984) | -2.510**<br>(1.133) | -0.194<br>(0.801)   | -0.060<br>(0.050)   | -1.059<br>(0.867)   | -1.241<br>(1.079)   |
| Observations                   | 294                 | 294                 | 294                 | 206                 | 294                 | 294                 |
| Adjusted R-squared             | 0.575               | 0.565               | 0.322               | 0.440               | 0.630               | 0.633               |
| Year FE                        | Yes                 | Yes                 | Yes                 | Yes                 | Yes                 | Yes                 |
| Industry* FE                   | Yes                 | Yes                 | Yes                 | Yes                 | Yes                 | Yes                 |

Notes: Significant at \*\*\*1%, \*\*5%, and \*10%.

Unit of analysis is "firm-year."

\*Industry is classified according to the SIC one-digit industry classification.

**Table A17.** Market pay sensitivity and innovation outcome.

| Job Type                | <i>Dependent variable: Innovation outcome</i> |                               |                                |                                |              |                  |              |
|-------------------------|-----------------------------------------------|-------------------------------|--------------------------------|--------------------------------|--------------|------------------|--------------|
|                         | All                                           | Complex Problem Solving (Low) | Complex Problem Solving (High) | Complex Problem Solving (High) |              |                  |              |
|                         |                                               |                               |                                | Low Collab.                    | High Collab. | Medium-High (Q3) | Highest (Q4) |
| (1)                     | (2)                                           | (3)                           | (4)                            | (5)                            | (6)          | (7)              |              |
| Market Pay              | -0.150**                                      | -0.073                        | -0.107                         | -0.155                         | -0.286**     | -0.129*          | -0.274       |
| Sensitivity $t-1$       | (0.061)                                       | (0.070)                       | (0.065)                        | (0.113)                        | (0.138)      | (0.077)          | (0.228)      |
| Knowledge               | 2.184***                                      | 2.217***                      | 2.060***                       | 2.590***                       | 2.055***     | 2.087***         | 2.456***     |
| Intensity $t-1$         | (0.443)                                       | (0.437)                       | (0.475)                        | (0.635)                        | (0.473)      | (0.487)          | (0.608)      |
| Revenues (logged) $t-1$ | 0.328***                                      | 0.328***                      | 0.311***                       | 0.321***                       | 0.305***     | 0.320***         | 0.331***     |
|                         | (0.036)                                       | (0.037)                       | (0.041)                        | (0.043)                        | (0.040)      | (0.040)          | (0.040)      |
| Leverage $t-1$          | -0.578                                        | -0.496                        | -0.582                         | -0.763*                        | -0.560       | -0.539           | -0.701       |
|                         | (0.353)                                       | (0.365)                       | (0.365)                        | (0.410)                        | (0.353)      | (0.366)          | (0.429)      |
| Constant                | -2.848***                                     | -2.862***                     | -2.663***                      | -2.735***                      | -2.631***    | -2.751***        | -2.805***    |
|                         | (0.297)                                       | (0.302)                       | (0.350)                        | (0.350)                        | (0.333)      | (0.330)          | (0.348)      |
| Year FE                 | Yes                                           | Yes                           | Yes                            | Yes                            | Yes          | Yes              | Yes          |
| Industry* FE            | Yes                                           | Yes                           | Yes                            | Yes                            | Yes          | Yes              | Yes          |
| Observations            | 229                                           | 229                           | 219                            | 202                            | 214          | 214              | 206          |
| Adjusted R-squared      | 0.674                                         | 0.663                         | 0.669                          | 0.662                          | 0.675        | 0.637            | 0.679        |

*Notes:* Significant at \*\*\*1%, \*\*5%, and \*10%.

Unit of analysis is “firm-year.” The dependent variable is the sum of z-scored innovation measures (number and stock of patents and publications, forward citations by the most cited patent, and the breakthrough index of most breakthrough innovation). The independent variable, *Market Pay Sensitivity*, is also z-scored for interpretability.

\*Industry is classified according to the SIC one-digit industry classification.

**Table A18.** Relationship between employee pay and internal and market pay benchmarks by pay premium/discount.

| Sample Type                                  | <i>Dependent variable: Employee pay</i> |                                      |                              |                                                                 |                                                                |                                                        |
|----------------------------------------------|-----------------------------------------|--------------------------------------|------------------------------|-----------------------------------------------------------------|----------------------------------------------------------------|--------------------------------------------------------|
|                                              | Pay Discount<br>(Year-Skill<br>Level)   | Pay Premium<br>(Year-Skill<br>Level) | All<br>(Year-Skill<br>Level) | Pay Discount<br>(Year-Skill<br>Level-<br>Occupation-<br>Region) | Pay Premium<br>(Year-Skill<br>Level-<br>Occupation-<br>Region) | All<br>(Year-Skill<br>Level-<br>Occupation-<br>Region) |
|                                              | (1)                                     | (2)                                  | (3)                          | (4)                                                             | (5)                                                            | (6)                                                    |
| Internal Pay                                 | 0.043***<br>(0.014)                     | 0.132***<br>(0.019)                  | 0.037***<br>(0.007)          | 0.063***<br>(0.013)                                             | 0.099***<br>(0.016)                                            | 0.029***<br>(0.006)                                    |
| Market Pay                                   | 0.036***<br>(0.007)                     | 0.025***<br>(0.007)                  | 0.027***<br>(0.003)          | 0.113***<br>(0.010)                                             | 0.126***<br>(0.014)                                            | 0.305***<br>(0.008)                                    |
| Internal Pay<br>× Pay Difference             |                                         |                                      | 0.073*<br>(0.041)            |                                                                 |                                                                | 0.146***<br>(0.029)                                    |
| Market Pay<br>× Pay Difference               |                                         |                                      | -0.056<br>(0.038)            |                                                                 |                                                                | -0.116***<br>(0.026)                                   |
| Pay Difference                               |                                         |                                      | 0.626*<br>(0.322)            |                                                                 |                                                                | 0.472<br>(0.311)                                       |
| ROA                                          | -0.042<br>(0.044)                       | 0.077<br>(0.050)                     | -0.028<br>(0.018)            | 0.008<br>(0.028)                                                | 0.000<br>(0.046)                                               | -0.027*<br>(0.016)                                     |
| Log Sale                                     | 0.006<br>(0.006)                        | 0.002<br>(0.006)                     | 0.001<br>(0.003)             | 0.001<br>(0.005)                                                | 0.002<br>(0.006)                                               | 0.000<br>(0.002)                                       |
| Constant                                     | 10.032***<br>(0.193)                    | 9.645***<br>(0.231)                  | 10.462***<br>(0.099)         | 9.020***<br>(0.168)                                             | 8.813***<br>(0.223)                                            | 7.434***<br>(0.082)                                    |
| Firm-Occupation-<br>Skill Level-Region<br>FE | Yes                                     | Yes                                  | Yes                          | Yes                                                             | Yes                                                            | Yes                                                    |
| Year FE                                      | Yes                                     | Yes                                  | Yes                          | Yes                                                             | Yes                                                            | Yes                                                    |
| Observations                                 | 90,787                                  | 67,288                               | 177,540                      | 81,975                                                          | 69,185                                                         | 177,540                                                |
| Adjusted R-<br>squared                       | 0.975                                   | 0.977                                | 0.994                        | 0.980                                                           | 0.979                                                          | 0.990                                                  |

Notes: Significant at \*\*\*1%, \*\*5%, and \*10%.

**Table A19.** Sample representativeness.

| Variable                         | A. Firm Characteristics |           |           |           |
|----------------------------------|-------------------------|-----------|-----------|-----------|
|                                  | Compustat               |           | Sample    |           |
|                                  | Mean                    | Std. Dev. | Mean      | Std. Dev. |
| Number of employees (000's)      | 7.77                    | 41.69     | 60.34     | 181.34    |
| Revenues (millions)              | 2778.01                 | 13,206.16 | 20326.86  | 45137.19  |
| Assets (millions)                | 8,472.24                | 79,386.06 | 28,282.57 | 85,883.81 |
| Market capitalization (millions) | 4291.72                 | 20121.26  | 27,092.77 | 59,936.27 |
| Return on assets                 | -2.29                   | 42.95     | 0.13      | 0.08      |

  

| Firm Size               | B. Distribution by Firm Size |            |                 |            |
|-------------------------|------------------------------|------------|-----------------|------------|
|                         | Compustat                    |            | Sample          |            |
|                         | Number of Firms              | % of Firms | Number of Firms | % of Firms |
| 25001 or More Employees | 322                          | 6.22       | 74              | 44.85      |
| 10001 – 25000 Employees | 399                          | 7.70       | 34              | 20.61      |
| 5001 - 10000 Employees  | 429                          | 8.28       | 26              | 15.76      |
| 2501 - 5000 Employees   | 492                          | 9.50       | 15              | 9.09       |
| 1001 - 2500 Employees   | 620                          | 11.97      | 11              | 6.67       |
| 501 - 1000 Employees    | 462                          | 8.92       | 2               | 1.21       |
| 251 - 500 Employees     | 479                          | 9.25       | 3               | 1.82       |
| 1 - 250 Employees       | 1,967                        | 38.18      | 0               | 0.00       |

**Table A20.** Sample Representativeness by industry (1-digit SIC).

| Industry                                                                    | A. Firm Distribution by Industry (1-digit SIC) |             |                 |             |
|-----------------------------------------------------------------------------|------------------------------------------------|-------------|-----------------|-------------|
|                                                                             | Compustat                                      |             | Sample          |             |
|                                                                             | Number of Firms                                | % of Sample | Number of Firms | % of Sample |
| Agriculture, Forestry and Fishing (0)                                       | 18                                             | 0.30        | 0               | 0.00        |
| Mining and Construction (1)                                                 | 436                                            | 7.19        | 8               | 4.85        |
| Food and Light Manufacturing (2)                                            | 1,034                                          | 17.06       | 59              | 35.76       |
| Heavy and High-Tech Manufacturing (3)                                       | 1,110                                          | 18.31       | 20              | 12.12       |
| Transportation, Communications,<br>Electric, Gas, and Sanitary Services (4) | 541                                            | 8.92        | 9               | 5.45        |
| Wholesale and Retail Trade (5)                                              | 446                                            | 7.36        | 49              | 29.70       |
| Finance, Insurance, and Real Estate (6)                                     | 1,446                                          | 23.85       | 11              | 6.67        |
| Hospitality and Consumer Services (7)                                       | 760                                            | 12.54       | 2               | 1.21        |
| Professional Services (8)                                                   | 195                                            | 3.22        | 5               | 3.03        |
| Public Administration (9)                                                   | 76                                             | 1.25        | 2               | 1.21        |

  

| Industry                                                                    | B. Employee Distribution by Industry (1-digit SIC) |                |                     |                |
|-----------------------------------------------------------------------------|----------------------------------------------------|----------------|---------------------|----------------|
|                                                                             | Compustat                                          |                | Sample              |                |
|                                                                             | Number of Employees                                | % of Employees | Number of Employees | % of Employees |
| Agriculture, Forestry and Fishing (0)                                       | 51,247                                             | 0.12           | 0                   | 0.00           |
| Mining and Construction (1)                                                 | 1,047,696                                          | 2.48           | 128,300             | 1.30           |
| Food and Light Manufacturing (2)                                            | 4,192,462                                          | 9.92           | 1,661,438           | 16.79          |
| Heavy and High-Tech Manufacturing (3)                                       | 7,605,971                                          | 18.00          | 490,258             | 4.95           |
| Transportation, Communications,<br>Electric, Gas, and Sanitary Services (4) | 5,164,396                                          | 12.22          | 390,500             | 3.95           |
| Wholesale and Retail Trade (5)                                              | 11,825,805                                         | 27.99          | 6,049,896           | 61.14          |
| Finance, Insurance, and Real Estate (6)                                     | 3,906,636                                          | 9.25           | 387,553             | 3.92           |
| Hospitality and Consumer Services (7)                                       | 5,673,450                                          | 13.43          | 52,200              | 0.53           |
| Professional Services (8)                                                   | 2,164,250                                          | 5.12           | 518,100             | 5.24           |
| Public Administration (9)                                                   | 614,565                                            | 1.45           | 216,800             | 2.19           |

**Table A21.** Relationship between employee pay, benchmarks, and occupation-year-level unemployment rate.

| Employee skill level                  | <i>Dependent variable: Employee pay</i> |              |              |                 |              |
|---------------------------------------|-----------------------------------------|--------------|--------------|-----------------|--------------|
|                                       | All                                     | Below median | Above median | Bottom Quartile | Top Quartile |
|                                       | (1)                                     | (2)          | (3)          | (4)             | (5)          |
| Internal Pay                          | 0.001                                   | 0.004        | -0.004       | 0.003           | 0.000        |
| × Unemployment rate                   | (0.002)                                 | (0.003)      | (0.004)      | (0.003)         | (0.005)      |
| Market Pay                            | -0.005**                                | -0.006**     | -0.006       | -0.005          | -0.005       |
| × Unemployment rate                   | (0.002)                                 | (0.003)      | (0.004)      | (0.003)         | (0.004)      |
| Internal Pay                          | 0.112***                                | 0.050**      | 0.226***     | 0.056**         | 0.241***     |
|                                       | (0.021)                                 | (0.024)      | (0.029)      | (0.022)         | (0.030)      |
| Market Pay                            | 0.071***                                | 0.070***     | 0.080***     | 0.064***        | 0.072***     |
|                                       | (0.015)                                 | (0.019)      | (0.024)      | (0.019)         | (0.024)      |
| Unemployment rate                     | 0.041***                                | 0.014        | 0.122**      | 0.018           | 0.052        |
|                                       | (0.014)                                 | (0.023)      | (0.050)      | (0.032)         | (0.060)      |
| ROA                                   | -0.022                                  | -0.068       | 0.100*       | 0.000           | 0.088        |
|                                       | (0.047)                                 | (0.056)      | (0.055)      | (0.050)         | (0.064)      |
| Log Sale                              | 0.006                                   | 0.010*       | -0.007       | 0.008*          | -0.005       |
|                                       | (0.006)                                 | (0.006)      | (0.008)      | (0.005)         | (0.008)      |
| Constant                              | 9.070***                                | 9.474***     | 8.132***     | 9.350***        | 8.161***     |
|                                       | (0.238)                                 | (0.245)      | (0.377)      | (0.241)         | (0.375)      |
| Firm-Occupation-Skill Level-Region FE | Yes                                     | Yes          | Yes          | Yes             | Yes          |
| Year FE                               | Yes                                     | Yes          | Yes          | Yes             | Yes          |
| Observations                          | 172,742                                 | 96,986       | 72,382       | 54,023          | 34,853       |
| Adjusted R-squared                    | 0.965                                   | 0.940        | 0.899        | 0.930           | 0.873        |

Notes: Significant at \*\*\*1%, \*\*5%, and \*10%.

Since unemployment rates are provided at either occupation or region level (but not at combined level), we conduct the analyses separately.

For each occupation-year, we compute the unemployment rate using BLS data on employment and unemployment. Table 17 and Table 32, respectively, from <https://www.bls.gov/cps/tables.htm>.

We follow the BLS definition of unemployment rate from [https://www.bls.gov/cps/cps\\_htgm.htm#nilf](https://www.bls.gov/cps/cps_htgm.htm#nilf).

**Table A22.** Relationship between employee pay, benchmarks, and region-year-level unemployment rate.

| Employee skill level                  | <i>Dependent variable: Employee pay</i> |              |              |                 |              |
|---------------------------------------|-----------------------------------------|--------------|--------------|-----------------|--------------|
|                                       | All                                     | Below median | Above median | Bottom Quartile | Top Quartile |
|                                       | (1)                                     | (2)          | (3)          | (4)             | (5)          |
| Internal Pay                          | 0.000                                   | 0.000        | 0.000        | 0.000           | -0.002***    |
| × Unemployment rate                   | (0.000)                                 | (0.000)      | (0.000)      | (0.000)         | (0.001)      |
| Market Pay                            | 0.000                                   | 0.000        | 0.000        | 0.001***        | 0.001        |
| × Unemployment rate                   | (0.000)                                 | (0.000)      | (0.000)      | (0.000)         | (0.001)      |
| Internal Pay                          | 0.120***                                | 0.072***     | 0.202***     | 0.067***        | 0.256***     |
|                                       | (0.019)                                 | (0.019)      | (0.029)      | (0.018)         | (0.027)      |
| Market Pay                            | 0.046***                                | 0.036***     | 0.052***     | 0.031***        | 0.044***     |
|                                       | (0.009)                                 | (0.010)      | (0.014)      | (0.011)         | (0.016)      |
| Unemployment rate                     | 0.002                                   | -0.005**     | 0.007*       | -0.013***       | 0.015*       |
|                                       | (0.002)                                 | (0.002)      | (0.004)      | (0.003)         | (0.008)      |
| ROA                                   | -0.023                                  | -0.075       | 0.112*       | -0.010          | 0.100        |
|                                       | (0.049)                                 | (0.059)      | (0.061)      | (0.053)         | (0.069)      |
| Log Sale                              | 0.006                                   | 0.009        | -0.007       | 0.007           | -0.004       |
|                                       | (0.007)                                 | (0.006)      | (0.008)      | (0.005)         | (0.009)      |
| Constant                              | 9.217***                                | 9.571***     | 8.705***     | 9.534***        | 8.255***     |
|                                       | (0.235)                                 | (0.231)      | (0.316)      | (0.206)         | (0.330)      |
| Firm-Occupation-Skill Level-Region FE | Yes                                     | Yes          | Yes          | Yes             | Yes          |
| Year FE                               | Yes                                     | Yes          | Yes          | Yes             | Yes          |
| Observations                          | 150,346                                 | 85,176       | 62,889       | 48,285          | 30,921       |
| Adjusted R-squared                    | 0.965                                   | 0.939        | 0.897        | 0.927           | 0.872        |

Notes: Significant at \*\*\*1%, \*\*5%, and \*10%.

BLS tracks unemployment and employment data at a county level (see “Annual Average Data” at “County” level on <https://www.bls.gov/lau/tables.htm>). We aggregate this data to our region level.

**Table A23.** Relationship between employee pay, benchmarks, and labor market concentration.

|                                           | <i>Dependent variable: Employee pay</i> |           |           |
|-------------------------------------------|-----------------------------------------|-----------|-----------|
|                                           | (1)                                     | (2)       | (3)       |
| Internal Pay                              | 0.389**                                 | 0.142     | 0.029     |
| × Labor Market HHI                        | (0.156)                                 | (0.140)   | (0.103)   |
| Market Pay                                | -0.353**                                | -0.265*   |           |
| × Labor Market HHI                        | (0.139)                                 | (0.153)   |           |
| Internal Pay                              |                                         | 0.761***  | 0.630***  |
| × Knowledge Intensity                     |                                         | (0.178)   | (0.179)   |
| Market Pay                                |                                         | -0.283*** |           |
| × Knowledge Intensity                     |                                         | (0.077)   |           |
| Internal Pay                              | -0.053                                  | 0.021     | 0.080     |
|                                           | (0.073)                                 | (0.076)   | (0.059)   |
| Market Pay                                | 0.202***                                | 0.187**   | 0.037**   |
|                                           | (0.072)                                 | (0.083)   | (0.016)   |
| Knowledge Intensity                       |                                         | -5.596*** | -7.313*** |
|                                           |                                         | (1.739)   | (2.055)   |
| Labor Market HHI                          | -0.643                                  | 1.156     | -0.524    |
|                                           | (1.160)                                 | (1.228)   | (1.122)   |
| ROA                                       | -0.001                                  | 0.023     | 0.032     |
|                                           | (0.063)                                 | (0.090)   | (0.091)   |
| Log Sale                                  | 0.000                                   | -0.002    | -0.002    |
|                                           | (0.010)                                 | (0.014)   | (0.015)   |
| Constant                                  | 9.606***                                | 8.947***  | 9.944***  |
|                                           | (0.614)                                 | (0.749)   | (0.688)   |
| Firm-Skill Level-<br>Occupation-Region FE | Yes                                     | Yes       | Yes       |
| Year FE                                   | Yes                                     | Yes       | Yes       |
| Observations                              | 60,880                                  | 98,778    | 48,341    |
| Adjusted R-squared                        | 0.967                                   | 0.966     | 0.968     |

*Notes:* Significant at \*\*\*1%, \*\*5%, and \*10%.

**Table A24.** Relationship between employee pay, pay benchmarks, and employee tenure.

| Tenure type                                        | <i>Dependent variable: Employee pay</i> |                                  |                                               |
|----------------------------------------------------|-----------------------------------------|----------------------------------|-----------------------------------------------|
|                                                    | Firm-Year-Skill Level                   | Firm-Year-Occupation-Skill Level | Firm-Year-Occupation-Skill Level-Region Level |
|                                                    | (1)                                     | (2)                              | (3)                                           |
| Internal Pay                                       | 0.009                                   | 0.002                            | 0.004                                         |
| × Above-Median Tenure                              | (0.010)                                 | (0.009)                          | (0.008)                                       |
| Market Pay                                         | -0.022                                  | -0.019                           | -0.022*                                       |
| × Above-Median Tenure                              | (0.019)                                 | (0.016)                          | (0.012)                                       |
| Internal Pay                                       | 0.100*                                  | 0.100*                           | 0.093*                                        |
|                                                    | (0.053)                                 | (0.052)                          | (0.053)                                       |
| Market Pay                                         | 0.113***                                | 0.114***                         | 0.115***                                      |
|                                                    | (0.037)                                 | (0.039)                          | (0.039)                                       |
| Above Median Tenure                                | 0.205                                   | 0.250**                          | 0.245**                                       |
|                                                    | (0.142)                                 | (0.108)                          | (0.098)                                       |
| Constant                                           | 8.635***                                | 8.642***                         | 8.702***                                      |
|                                                    | (0.588)                                 | (0.562)                          | (0.581)                                       |
| Firm FE, Occupation FE, Skill Level FE, Region FE* | Yes                                     | Yes                              | Yes                                           |
| Observations                                       | 21,815                                  | 22,366                           | 21,651                                        |
| Adjusted R-squared                                 | 0.908                                   | 0.908                            | 0.907                                         |

*Notes:* Significant at \*\*\*1%, \*\*5%, and \*10%.

Unit of analysis is “firm-year-skill-occupation-region-FSHC.”

The company collected tenure data only in the last year (2020) of our sample, which we have for 73% of the records from that year. So, an important caveat is that this analysis covers a small portion of our data. That said, this subsample exhibits the same broad patterns as our main sample does, so it appears to be representative of our full dataset. To conduct this test, we cannot apply the main model with four-way interacted fixed effects (firm-skill-occupation-region) and year fixed effects. Instead, we use firm fixed effects, skill level fixed effects, occupation fixed effects, and region fixed effects.

We split this subsample into two groups based on the median employee tenure. We try this split in three ways: by firm-year-level in Column 1; by firm-year-occupation-level in Column 2; and by firm-year-occupation-skill level-region level in Column 3).

**Table A25.** Relationship between employee pay and internal and market pay benchmarks, internal pay benchmark moderated by surplus.

| Dependent variable                    | <i>Cash compensation</i> | <i>Base salary</i>  | <i>Bonus</i>        |
|---------------------------------------|--------------------------|---------------------|---------------------|
|                                       | (1)                      | (2)                 | (3)                 |
| Internal Pay × ROA                    | -0.085<br>(0.056)        | -0.102*<br>(0.059)  | -0.346<br>(0.370)   |
| Internal Pay                          | 0.127***<br>(0.022)      | 0.076***<br>(0.018) | 0.558***<br>(0.053) |
| Market Pay                            | 0.044***<br>(0.009)      | 0.041***<br>(0.008) | 0.035**<br>(0.017)  |
| ROA                                   | 0.952<br>(0.631)         | 1.067<br>(0.648)    | 3.403<br>(2.673)    |
| Log Sale                              | 0.000<br>(0.008)         | 0.001<br>(0.006)    | -0.015<br>(0.228)   |
| Constant                              | 9.241***<br>(0.270)      | 9.793***<br>(0.213) | 1.135<br>(2.152)    |
| Firm-Occupation-Skill Level-Region FE | Yes                      | Yes                 | Yes                 |
| Year FE                               | Yes                      | Yes                 | Yes                 |
| Observations                          | 120,880                  | 120,880             | 120,880             |
| Adjusted R-squared                    | 0.967                    | 0.969               | 0.752               |

*Notes:* Significant at \*\*\*1%, \*\*5%, and \*10%.

The benchmarks correspond to their respective pay component. For example, in Column 2, *Internal Pay* and *Market Pay* are calculated using base salaries.

The number of observations is less than 177,540 because ROA is available for public firms only.

**Table A26.** Relationship between employee pay and internal and market pay benchmarks, moderated by surplus and knowledge intensity.

| Dependent variable                    | <i>Cash</i>         | <i>Cash</i>         | <i>Base salary</i> | <i>Base salary</i> | <i>Bonus</i> | <i>Bonus</i> |
|---------------------------------------|---------------------|---------------------|--------------------|--------------------|--------------|--------------|
|                                       | <i>compensation</i> | <i>compensation</i> |                    |                    |              |              |
|                                       | (1)                 | (2)                 | (3)                | (4)                | (5)          | (6)          |
| Internal Pay                          | 0.611***            | 0.615***            | 0.268***           | 0.273***           | 0.645***     | 0.644***     |
| × Knowledge Intensity                 | (0.156)             | (0.154)             | (0.074)            | (0.074)            | (0.159)      | (0.157)      |
| Internal Pay                          |                     | -0.092              |                    | -0.079             |              | -0.256       |
| × ROA                                 |                     | (0.085)             |                    | (0.063)            |              | (0.469)      |
| Internal Pay                          | 0.090***            | 0.102***            | 0.045***           | 0.055***           | 0.507***     | 0.535***     |
|                                       | (0.020)             | (0.021)             | (0.016)            | (0.017)            | (0.047)      | (0.063)      |
| Market Pay                            | 0.046***            | 0.046***            | 0.045***           | 0.045***           | 0.035**      | 0.033**      |
|                                       | (0.010)             | (0.010)             | (0.010)            | (0.010)            | (0.017)      | (0.017)      |
| Knowledge Intensity                   | -7.076***           | -7.116***           | -3.076***          | -3.128***          | -7.628***    | -7.619***    |
|                                       | (1.779)             | (1.762)             | (0.831)            | (0.837)            | (2.109)      | (2.115)      |
| ROA                                   | 0.030               | 1.063               | -0.062             | 0.821              | 2.122*       | 3.848        |
|                                       | (0.062)             | (0.969)             | (0.05)             | (0.702)            | (1.131)      | (3.481)      |
| Log Sale                              | 0.001               | 0.001               | 0.000              | 0.001              | -0.250       | -0.256       |
|                                       | (0.011)             | (0.011)             | (0.007)            | (0.007)            | (0.214)      | (0.211)      |
| Constant                              | 9.624***            | 9.483***            | 10.089***          | 9.976***           | 3.928*       | 3.802*       |
|                                       | (0.283)             | (0.282)             | (0.203)            | (0.211)            | (2.129)      | (2.141)      |
| Firm-Occupation-Skill Level-Region FE | Yes                 | Yes                 | Yes                | Yes                | Yes          | Yes          |
| Year FE                               | Yes                 | Yes                 | Yes                | Yes                | Yes          | Yes          |
| Observations                          | 98,778              | 98,778              | 98,778             | 98,778             | 98,778       | 98,778       |
| Adjusted R-squared                    | 0.966               | 0.966               | 0.969              | 0.969              | 0.768        | 0.768        |

Notes: Significant at \*\*\*1%, \*\*5%, and \*10%.

The number of observations is smaller in Column 2 because *Knowledge Intensity* is available for a subset of public firms only.

**Table A27.** Relationship between employee pay and internal and market pay benchmarks, market pay benchmark moderated by ROA.

| ROA split type                           | <i>Dependent variable: Employee pay</i>    |                                            |                                                        |                                                        |
|------------------------------------------|--------------------------------------------|--------------------------------------------|--------------------------------------------------------|--------------------------------------------------------|
|                                          | Below-Median<br>ROA<br>(Year Level)<br>(1) | Above-Median<br>ROA<br>(Year Level)<br>(2) | Below-Median<br>ROA<br>(Year-Industry<br>Level)<br>(3) | Above-Median<br>ROA<br>(Year-Industry<br>Level)<br>(4) |
| Internal Pay                             | 0.124***<br>(0.030)                        | 0.100***<br>(0.032)                        | 0.133***<br>(0.035)                                    | 0.076***<br>(0.025)                                    |
| Market Pay                               | 0.033***<br>(0.010)                        | 0.044***<br>(0.014)                        | 0.038***<br>(0.011)                                    | 0.048***<br>(0.014)                                    |
| ROA                                      | 0.041<br>(0.074)                           | -0.126*<br>(0.070)                         | 0.075<br>(0.087)                                       | -0.111<br>(0.072)                                      |
| Log Sale                                 | 0.001<br>(0.007)                           | -0.005<br>(0.021)                          | 0.005<br>(0.009)                                       | 0.002<br>(0.015)                                       |
| Constant                                 | 9.39***<br>(0.311)                         | 9.611***<br>(0.497)                        | 9.189***<br>(0.360)                                    | 9.769***<br>(0.428)                                    |
| Firm-Occupation-Skill<br>Level-Region FE | Yes                                        | Yes                                        | Yes                                                    | Yes                                                    |
| Year FE                                  | Yes                                        | Yes                                        | Yes                                                    | Yes                                                    |
| Observations                             | 59,481                                     | 46,460                                     | 58,034                                                 | 47,232                                                 |
| Adjusted R-squared                       | 0.975                                      | 0.961                                      | 0.974                                                  | 0.963                                                  |

Notes: Significant at \*\*\*1%, \*\*5%, and \*10%.

**Table A28.** Relationship between employee pay and internal and market pay benchmarks by employee type in **low-knowledge** firms.

| Job Type                              | <i>Dependent variable: Employee pay</i> |                                    |                                |                     |                       |                     |
|---------------------------------------|-----------------------------------------|------------------------------------|--------------------------------|---------------------|-----------------------|---------------------|
|                                       | Complex Problem Solving (Low) (1)       | Complex Problem Solving (High) (2) | Complex Problem Solving (High) |                     |                       |                     |
|                                       |                                         |                                    | Low Collab. (3)                | High Collab. (4)    | High-Highest (Q3) (5) | Highest (Q4) (6)    |
| Internal Pay                          | 0.046**<br>(0.020)                      | 0.083***<br>(0.014)                | 0.068***<br>(0.019)            | 0.095***<br>(0.015) | 0.094***<br>(0.014)   | 0.073***<br>(0.024) |
| Market Pay                            | 0.044***<br>(0.014)                     | 0.080***<br>(0.018)                | 0.019<br>(0.027)               | 0.122***<br>(0.023) | 0.002<br>(0.016)      | 0.150***<br>(0.027) |
| ROA                                   | -0.149**<br>(0.063)                     | 0.088<br>(0.060)                   | 0.111<br>(0.077)               | 0.074<br>(0.057)    | 0.058<br>(0.067)      | 0.141*<br>(0.079)   |
| Log Sale                              | 0.007<br>(0.010)                        | 0.006<br>(0.009)                   | 0.009<br>(0.009)               | 0.004<br>(0.012)    | -0.002<br>(0.008)     | 0.025<br>(0.018)    |
| Constant                              | 9.877***<br>(0.309)                     | 9.511***<br>(0.215)                | 10.157***<br>(0.349)           | 9.008***<br>(0.306) | 10.302***<br>(0.216)  | 8.744***<br>(0.396) |
| Firm-Occupation-Skill Level-Region FE | Yes                                     | Yes                                | Yes                            | Yes                 | Yes                   | Yes                 |
| Year FE                               | Yes                                     | Yes                                | Yes                            | Yes                 | Yes                   | Yes                 |
| Observations                          | 53,053                                  | 17,305                             | 5,752                          | 11,553              | 10,908                | 6,397               |
| Adjusted R-squared                    | 0.953                                   | 0.949                              | 0.938                          | 0.939               | 0.951                 | 0.939               |

Notes: Significant at \*\*\*1%, \*\*5%, and \*10%.

**Table A29.** Relationship between employee pay and internal and market pay benchmarks by employee type in **high-knowledge** firms.

| Job Type                              | <i>Dependent variable: Employee pay</i> |                                    |                                |                     |                       |                     |
|---------------------------------------|-----------------------------------------|------------------------------------|--------------------------------|---------------------|-----------------------|---------------------|
|                                       | Complex Problem Solving (Low) (1)       | Complex Problem Solving (High) (2) | Complex Problem Solving (High) |                     |                       |                     |
|                                       |                                         |                                    | Low Collab. (3)                | High Collab. (4)    | High-Highest (Q3) (5) | Highest (Q4) (6)    |
| Internal Pay                          | 0.296***<br>(0.042)                     | 0.427***<br>(0.050)                | 0.287***<br>(0.060)            | 0.471***<br>(0.051) | 0.521***<br>(0.052)   | 0.389***<br>(0.056) |
| Market Pay                            | 0.020***<br>(0.007)                     | 0.003<br>(0.013)                   | 0.014<br>(0.015)               | -0.001<br>(0.016)   | -0.004<br>(0.020)     | 0.010<br>(0.015)    |
| ROA                                   | 0.108<br>(0.068)                        | 0.107<br>(0.072)                   | 0.000<br>(0.110)               | 0.138**<br>(0.062)  | 0.171**<br>(0.071)    | 0.080<br>(0.099)    |
| Log Sale                              | 0.002<br>(0.008)                        | 0.012<br>(0.010)                   | 0.022<br>(0.016)               | 0.006<br>(0.008)    | 0.002<br>(0.010)      | 0.014<br>(0.012)    |
| Constant                              | 7.687***<br>(0.473)                     | 6.463***<br>(0.589)                | 7.690***<br>(0.686)            | 6.101***<br>(0.617) | 5.551***<br>(0.679)   | 6.797***<br>(0.657) |
| Firm-Occupation-Skill Level-Region FE | Yes                                     | Yes                                | Yes                            | Yes                 | Yes                   | Yes                 |
| Year FE                               | Yes                                     | Yes                                | Yes                            | Yes                 | Yes                   | Yes                 |
| Observations                          | 30,511                                  | 24,028                             | 6,533                          | 17,495              | 9,955                 | 14,073              |
| Adjusted R-squared                    | 0.961                                   | 0.957                              | 0.943                          | 0.947               | 0.948                 | 0.963               |

Notes: Significant at \*\*\*1%, \*\*5%, and \*10%.
